# Supplementary material for: Tree island area in oil palm agroforests directly and indirectly drives evaporative fraction
Source: Copernicus journal article supplement (doi:10.5194/egusphere-2025-2596), 2025-06-18
Supplement: Supplementary file 1 [file egusphere-2025-2596-supplement.pdf]

# Tree island area in oil palm agroforests directly and indirectly drives evaporative fraction

Thorge Wintz<sup>1</sup>, Alexander Röhl<sup>2</sup>, Gustavo Brant Paterno<sup>3</sup>, Florian Ellsäßer<sup>4</sup>, Delphine Clara Zemp<sup>5</sup>,  
5 Hendrayanto<sup>6</sup>, Bambang Irawan<sup>7</sup>, Alexander Knohl<sup>8,9</sup>, Holger Kreft<sup>3,9</sup>, Dirk Hölscher<sup>1,9</sup>

<sup>1</sup> Tropical Silviculture and Forest Ecology, University of Göttingen, Büsgenweg 1, 37077 Göttingen, Germany

<sup>2</sup> Horticultural Sciences, Institute for Crop Science and Resource Conservation, Bonn University, Auf dem Hügel 6, 53121 Bonn, Germany

<sup>3</sup> Biodiversity, Macroecology & Biogeography, University of Göttingen, Büsgenweg 1, 37077 Göttingen, Germany

10 <sup>4</sup> Department of Natural Resources, ITC, University of Twente, 7522 NH Enschede, Netherlands

<sup>5</sup> Conservation Biology, Institute of Biology, Faculty of Sciences, University of Neuchâtel, Neuchâtel, Switzerland

<sup>6</sup> Faculty of Forestry, Bogor Agricultural University, Campus Darmaga Bogor, Jawa Barat 16680, Indonesia

<sup>7</sup> Forestry Department, Faculty of Agriculture, University of Jambi, Jambi, 36122, Indonesia

<sup>8</sup> Bioclimatology, University of Göttingen, Büsgenweg 2, 37077 Göttingen, Germany

15 <sup>9</sup> Centre of Biodiversity and Sustainable Land Use, University of Göttingen, Büsgenweg 1, 37077 Göttingen, Germany

*Correspondence to:* Thorge Wintz ([twintz@uni-goettingen.de](mailto:twintz@uni-goettingen.de))

20

25

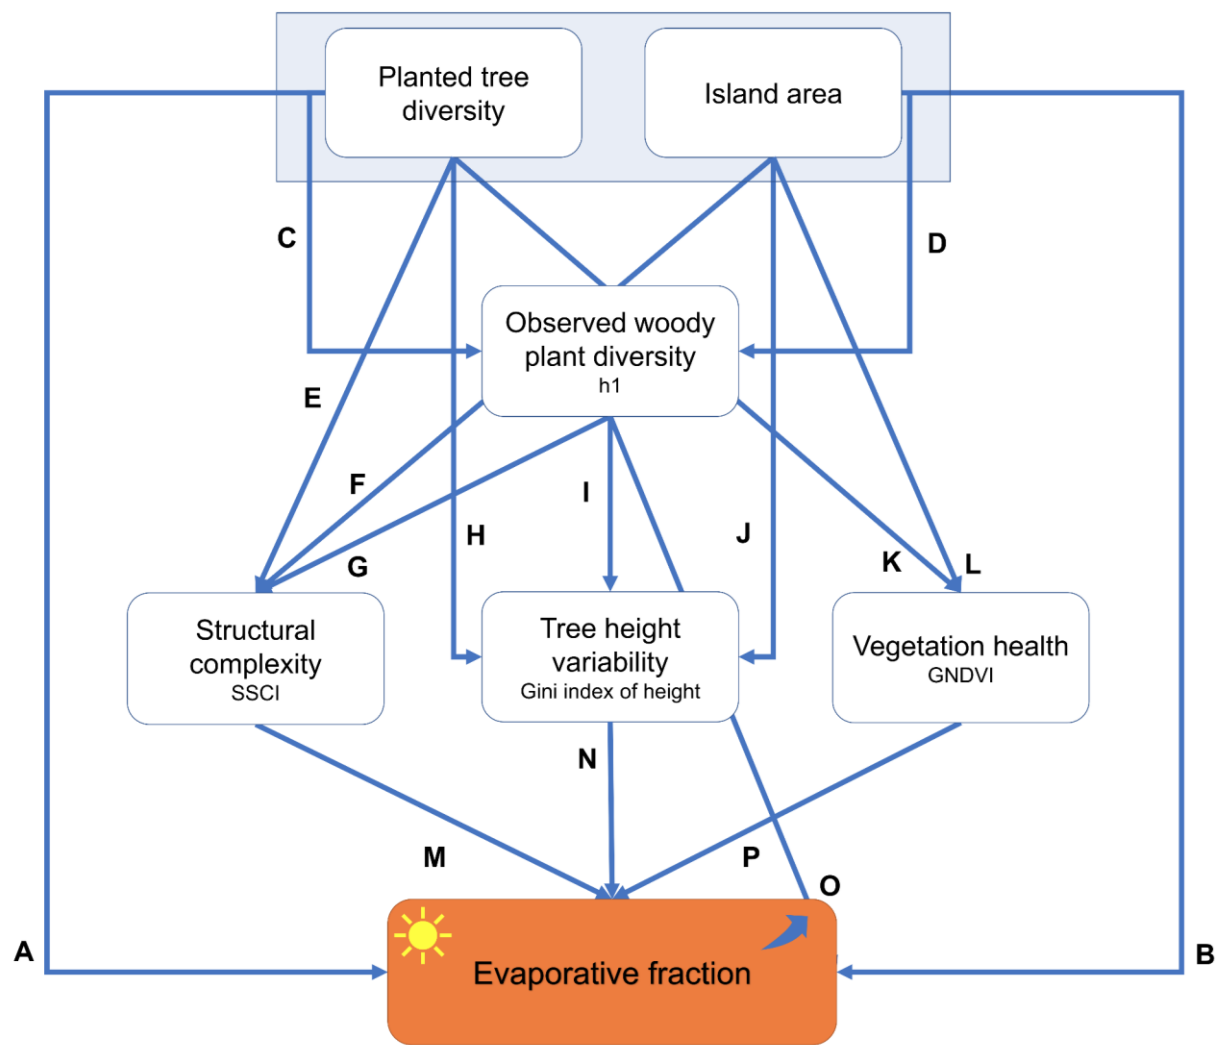

Figure S1: Conceptual model describing the potential drivers influencing Evaporative fraction.

**Table S1: Mechanistic framework linking studied variables with evaporative fraction.**

| Path | Relationship                                                  | Mechanisms                                                                                                                                                                                                                                                | Prediction                                                                                                                         |
|------|---------------------------------------------------------------|-----------------------------------------------------------------------------------------------------------------------------------------------------------------------------------------------------------------------------------------------------------|------------------------------------------------------------------------------------------------------------------------------------|
| A    | Planted tree diversity<br>↓<br>EF                             | I - A higher tree diversity creates complementary effects that lead to a more efficient use of energy and therefore higher EF.                                                                                                                            | A higher (planted / spontaneous) diversity increases EF (Bigelow, 2001; González-Espinosa et al., 2004; Wang et al., 2021).        |
| O    | Observed woody diversity<br>↓<br>EF                           |                                                                                                                                                                                                                                                           |                                                                                                                                    |
| B    | Island area<br>↓<br>EF                                        | I - In a larger tree island, the effect of trees over oil palm is stronger, creating a more forest-like microclimate.<br><br>II - Greater edge length in larger tree islands increases the area influenced by edge effects, where EF is typically higher. | In larger tree islands, EF is higher (Cregg and Dix, 2001).                                                                        |
| C    | Planted Tree diversity<br>↓<br>Observed woody plant diversity | I - Planted trees attract animals that spread seeds (zoochory) and thereby facilitate natural regeneration.<br><br>II - Planted trees modify environmental conditions, create niches that support natural regeneration.                                   | Observed woody plant diversity is higher in islands with higher planted tree diversity (Paterno et al., 2016; Tinya et al., 2019). |

|   |                                                                |                                                                                                                                                                                                                                                       |                                                                                                                                                                                 |
|---|----------------------------------------------------------------|-------------------------------------------------------------------------------------------------------------------------------------------------------------------------------------------------------------------------------------------------------|---------------------------------------------------------------------------------------------------------------------------------------------------------------------------------|
| E | Planted tree diversity<br>↓<br>Structural complexity           | I - Different species occupy different parts of the growing space.                                                                                                                                                                                    | Structural diversity in oil palm increases through higher planted tree diversity and observed woody plant diversity (Zemp et al., 2019; Kikuchi et al., 2024).                  |
| G | Observed woody plant diversity<br>↓<br>Structural complexity   |                                                                                                                                                                                                                                                       |                                                                                                                                                                                 |
| I | Observed woody plant diversity<br>↓<br>Tree height variability | I - A higher diversity of woody plants also results in a higher morphological diversity, focusing here on tree height.                                                                                                                                | Higher observed woody plant diversity leads to higher tree height variability.                                                                                                  |
| J | Island area<br>↓<br>Tree height variability                    | I – Larger tree islands harbor a greater diversity of tree species.<br>II – Higher tree diversity results in an increased variability of tree height.                                                                                                 | Higher diversity in larger tree islands (Drakare et al., 2006) leads to higher tree height variability in these tree islands (Marks et al., 2016).                              |
| L | Island area<br>↓<br>Vegetation health                          | I - Larger tree islands contribute to more homogeneous microclimatic conditions, thereby fostering enhanced vegetation health.<br>II - Within larger tree islands, there is a greater richness of tree species, thereby amplifying vegetation health. | Larger tree islands increase vegetation health.                                                                                                                                 |
| D | Island area<br>↓<br>Observed woody plant diversity             | I - Bigger islands receive more seeds from outside.<br>II - Bigger islands harbor greater tree diversity by providing more niches (Island Biogeography theory).                                                                                       | Larger tree islands have more observed woody plant species than smaller tree islands (Zahawi and Augspurger, 2006; Holl et al., 2020; Zemp et al., 2023; Paterno et al., 2024). |
| F | Island area<br>↓                                               | I - Larger tree islands provide greater opportunities for spatial diversification.                                                                                                                                                                    | Larger tree island have higher structural complexity (Zemp et al., 2019).                                                                                                       |

|   |                                                        |                                                                                                                                                                                                |                                                                                                                                 |
|---|--------------------------------------------------------|------------------------------------------------------------------------------------------------------------------------------------------------------------------------------------------------|---------------------------------------------------------------------------------------------------------------------------------|
|   | Structural complexity                                  |                                                                                                                                                                                                |                                                                                                                                 |
| H | Planted tree diversity<br>↓<br>Tree height variability | I - Higher tree diversity increases tree height variability due to interspecific differences in morphology and growth strategy.                                                                | Higher planted tree diversity increases variability in tree height (Marks et al., 2016).                                        |
| K | Planted tree diversity<br>↓<br>Vegetation health       | I - A higher diversity of planted trees enhances vegetation health, as a greater number of species increases the potential for beneficial interactions among species.                          | Vegetation health increases with greater planted tree diversity (Cayuela et al., 2006; Pau et al., 2012; Mapfumo et al., 2016). |
| M | Structural complexity<br>↓<br>EF                       | I - In a more complex island, there are more layers to capture radiation and transform it into latent heat.<br><br>II – More complex structures provide more surface area, which increases ET. | Higher structural complexity increases EF (Ehbrecht et al., 2017; Ren et al., 2018; Forzieri et al., 2020; Wang et al., 2021).  |
| N | Tree height variability<br>↓<br>EF                     | I - Higher variability in tree height increases surface roughness.<br><br>II - Higher surface roughness facilitates heat fluxes.                                                               | Higher tree height variability increases EF (Chen et al., 2020; Barbeta et al., 2023).                                          |
| P | Vegetation health<br>↓<br>EF                           | I - Low health of vegetation reduces the ability to convert radiation into latent heat.                                                                                                        | Higher vegetation health increases EF (Yang and Wang, 2011; Er-Raki et al., 2013; Zhou and Wang, 2016).                         |

50        **2. Scale independence of EF**

Workflow:

1.    Select 400 m<sup>2</sup> (n = 13) and 1600 m<sup>2</sup> (n = 13) tree islands.
2.    Apply negative buffer to simulate smaller tree islands:

a.    For 1600 m<sup>2</sup> tree islands:

i.    10 m buffer → 400 m<sup>2</sup>

ii.   15 m buffer → 100 m<sup>2</sup>

iii.  17.5 m buffer → 25 m<sup>2</sup>

b.    For 400 m<sup>2</sup> tree islands:

i.    5 m buffer → 100 m<sup>2</sup>

ii.   7.5 m buffer → 25 m<sup>2</sup>

2.    For each original plot size group:

a.    Fit a linear model: EF ~ size

b.    Fit a mixed-effects model: EF ~ size + (1|ID) using tree island ID as random effect
- 65    **Table S2: Scale independence of EF**
- | Model                | Slope  | SE      | R <sup>2</sup> (adj.) | p - value | Random effect variance |
|----------------------|--------|---------|-----------------------|-----------|------------------------|
| 1600 m <sup>2</sup>  | 0.0004 | 0.00062 | - 0.012               | 0.52      |                        |
| Linear               |        |         |                       |           |                        |
| 1600 m <sup>2</sup>  | 0.0004 | 0.00029 |                       | 0.17      | 0.003                  |
| Linear mixed effects |        |         |                       |           |                        |
| 400 m <sup>2</sup>   | 0.0016 | 0.00142 | 0.009                 | 0.26      |                        |
| Linear               |        |         |                       |           |                        |
| 400 m <sup>2</sup>   | 0.0016 | 0.001   |                       | 0.12      | 0.001                  |
| Linear mixed effects |        |         |                       |           |                        |
- 6

### 3. LST min, LST mean and LST max vs. plot size

70 Workflow:

1. Use tree island polygons to clip land surface temperature (LST) orthomosaics.
2. For each tree island, extract:
  - a. Mean LST of all pixels
  - b. Mean of the 1% highest LST values
  - 75 c. Mean of the 0.5% lowest LST values
3. Test for differences between tree island area groups using the Kruskal-Wallis test (non-parametric).

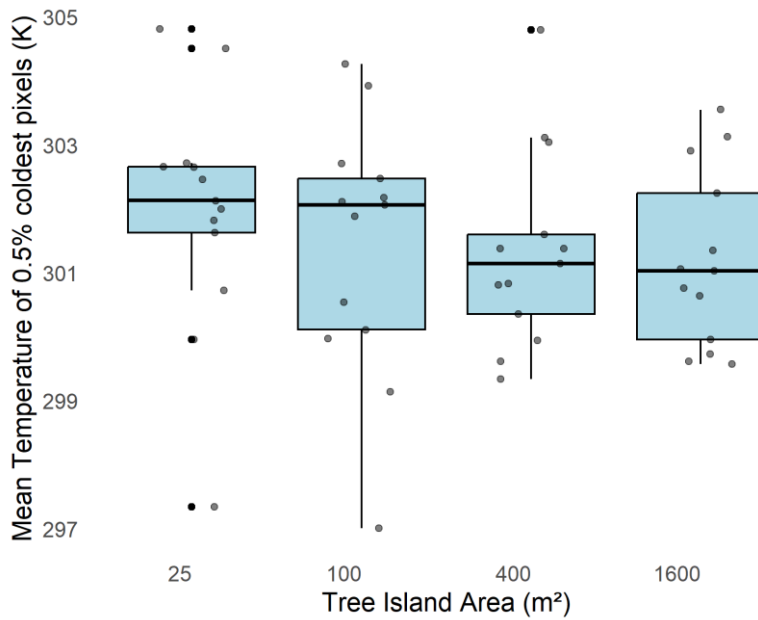

**Figure S2: Mean land surface temperature of the 0.5% coldest pixels within each tree island, grouped by tree island area. No significant differences were found between island area groups (Kruskal-Wallis test,  $p = 0.48$ ).**

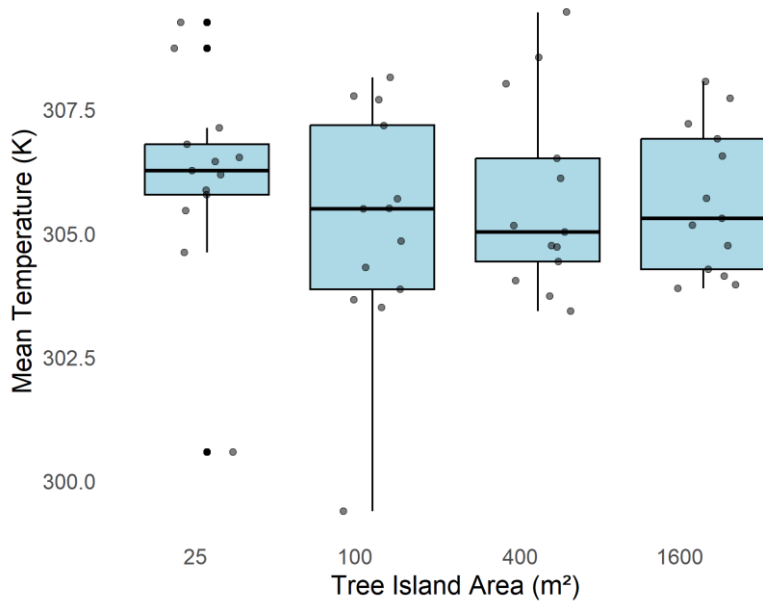

**Figure S3: Mean land surface temperature of all pixels within each tree island, grouped by tree island area. No significant differences were found between island area groups (Kruskal-Wallis test,  $p = 0.5$ ).**

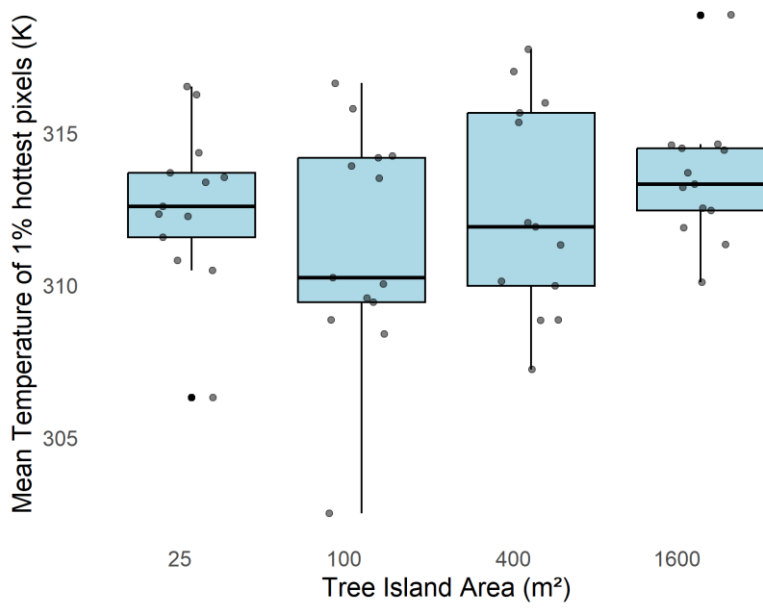

**Figure S4: Mean land surface temperature of the 1% hottest pixels within each tree island, grouped by tree island area. No significant differences were found between island area groups (Kruskal-Wallis test,  $p = 0.48$ ).**



4. Edge gradients of EF

Workflow:

1. Generate concentric bands (0.5 m width) for each tree island of 100 m<sup>2</sup>, 400 m<sup>2</sup> and 1600 m<sup>2</sup>.
2. Calculate the area of each band.
- 90 3. Use the bands as spatial masks to extract EF values from QWater Model raster outputs.
4. Fit a linear mixed-effects model with edge distance as fixed effect, tree island ID as a random effect and band area as weights:  
(EF ~ edge distance + (1|Plot), weights = 1 / area).

95 Table S3: Mixed random effects model results.

| Tree island area                                              | Edge gradient | EF ~ Distance + (1   Plot), weights = 1/area | Marginal R <sup>2</sup> | Conditional R <sup>2</sup> |
|---------------------------------------------------------------|---------------|----------------------------------------------|-------------------------|----------------------------|
| 100 m <sup>2</sup> + 400 m <sup>2</sup> + 1600 m <sup>2</sup> | 0 – 5 m       | Distance: n.s.                               |                         |                            |
| 400 m <sup>2</sup> + 1600 m <sup>2</sup>                      | 0 – 10 m      | Distance: p < 0.05                           | 0.011                   | 0.943                      |
| 100 m <sup>2</sup>                                            | 0 – 4.5 m     | Distance: n.s.                               |                         |                            |
| 400 m <sup>2</sup>                                            | 0 – 9.5 m     | Distance: p < 0.001                          | 0.074                   | 0.934                      |
| 1600 m <sup>2</sup>                                           | 0 – 17.5 m    | Distance: p < 0.05                           | 0.003                   | 0.993                      |

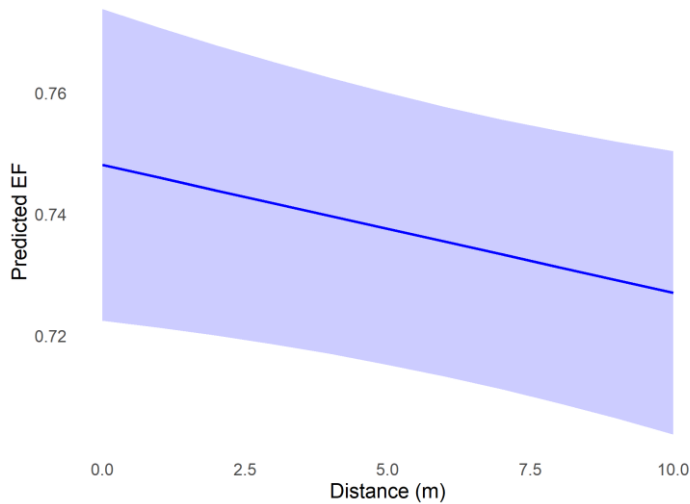

100 **Figure S5: Predicted evaporative fraction for 400 m<sup>2</sup> and 1600 m<sup>2</sup> as function of edge distance. Predictions based on a linear mixed-effects model with distance as fixed effect and tree island as random intercept ( $EF = 0.748 + -0.0021 * \text{Distance}$ ). EF decreased significantly with distance ( $-0.0021 \pm 0.001 \text{ SE}$ ,  $p = 0.0386$ ). The model explained 1.1% of the variance with fixed effects (marginal  $R^2$ ), and 94.3% including random effects (conditional  $R^2$ ).**

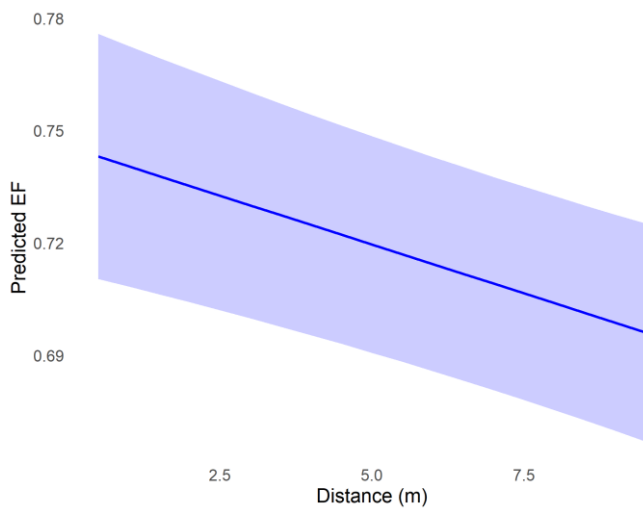

105 **Figure S6: Predicted evaporative fraction for 400 m<sup>2</sup> as function of edge distance. Predictions based on a linear mixed-effects model with distance as fixed effect and tree island as random intercept ( $EF = 0.746 + -0.0052 * \text{Distance}$ ). EF decreased significantly with distance ( $-0.0052 \pm 0.00125 \text{ SE}$ ,  $p = 0.00004$ ). The model explained 7% of the variance with fixed effects (marginal  $R^2$ ), and 93.4% including random effects (conditional  $R^2$ ).**

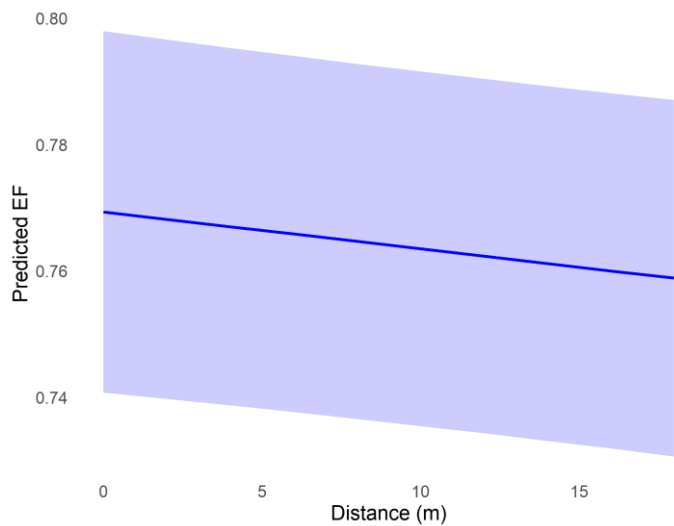

110 **Figure S7: Predicted evaporative fraction for 1600 m<sup>2</sup> as function of edge distance. Predictions based on a linear mixed-effects model with distance as fixed effect and tree island as random intercept ( $EF = 0.769 + -6e-04 * Distance$ ). EF decreased significantly with distance ( $-0.00058 \pm 0.00024$  SE,  $p = 0.016$ ). The model explained 0.3% of the variance with fixed effects (marginal  $R^2$ ), and 99.3% including random effects (conditional  $R^2$ ).**

115

120

## References

- Barbeta, A., Miralles, D. G., Mendiola, L., Gimeno, T. E., Sabaté, S., and Carnicer, J.: Disentangling the Role of Forest  
125 Structure and Functional Traits in the Thermal Balance of the Mediterranean–Temperate Ecotone, *JGR Biogeosciences*,  
128, <https://doi.org/10.1029/2022JG007264>, 2023.
- Bigelow, S.: Evapotranspiration modelled from stands of three broad-leaved tropical trees in Costa Rica, *Hydrological  
Processes*, 15, 2779–2796, <https://doi.org/10.1002/hyp.268>, 2001.
- Cayuela, L., Benayas, J. M. R., Justel, A., and Salas-Rey, J.: Modelling tree diversity in a highly fragmented tropical  
130 montane landscape, *Global Ecology and Biogeography*, 15, 602–613, <https://doi.org/10.1111/j.1466-8238.2006.00255.x>,  
2006.
- Chen, J., Jin, S., and Du, P.: Roles of horizontal and vertical tree canopy structure in mitigating daytime and nighttime urban  
heat island effects, *International Journal of Applied Earth Observation and Geoinformation*, 89, 102060,  
<https://doi.org/10.1016/j.jag.2020.102060>, 2020.
- 135 Cregg, B. and Dix, M.: Tree Moisture Stress and Insect Damage in Urban Areas in Relation to Heat Island Effects, *AUF*, 27,  
8–17, <https://doi.org/10.48044/jauf.2001.002>, 2001.
- Drakare, S., Lennon, J. J., and Hillebrand, H.: The imprint of the geographical, evolutionary and ecological context on  
species-area relationships, *Ecology letters*, 9, 215–227, <https://doi.org/10.1111/j.1461-0248.2005.00848.x>, 2006.
- Ehbrecht, M., Schall, P., Ammer, C., and Seidel, D.: Quantifying stand structural complexity and its relationship with forest  
140 management, tree species diversity and microclimate, *Agricultural and Forest Meteorology*, 242, 1–9,  
<https://doi.org/10.1016/j.agrformet.2017.04.012>, 2017.
- Er-Raki, S., Rodriguez, J. C., Garatuza-Payan, J., Watts, C. J., and Chehbouni, A.: Determination of crop evapotranspiration  
of table grapes in a semi-arid region of Northwest Mexico using multi-spectral vegetation index, *Agricultural Water  
Management*, 122, 12–19, <https://doi.org/10.1016/j.agwat.2013.02.007>, 2013.
- 145 Forzieri, G., Miralles, D. G., Ciais, P., Alkama, R., Ryu, Y., Duveiller, G., Zhang, K., Robertson, E., Kautz, M., Martens, B.,  
Jiang, C., Arneth, A., Georgievski, G., Li, W., Ceccherini, G., Anthoni, P., Lawrence, P., Wiltshire, A., Pongratz, J.,  
Piao, S., Sitch, S., Goll, D. S., Arora, V. K., Lienert, S., Lombardozzi, D., Kato, E., Nabel, J. E. M. S., Tian, H.,  
Friedlingstein, P., and Cescatti, A.: Increased control of vegetation on global terrestrial energy fluxes, *Nat. Clim.  
Chang.*, 10, 356–362, <https://doi.org/10.1038/s41558-020-0717-0>, 2020.
- 150 González-Espinosa, M., María Rey-Benayas, J., Ramírez-Marcial, N., Huston, M. A., and Golicher, D.: Tree diversity in the  
northern Neotropics: regional patterns in highly diverse Chiapas, Mexico, *Ecography*, 27, 741–756,  
<https://doi.org/10.1111/j.0906-7590.2004.04103.x>, 2004.
- Holl, K. D., Reid, J. L., Cole, R. J., Oviedo-Brenes, F., Rosales, J. A., and Zahawi, R. A.: Applied nucleation facilitates  
tropical forest recovery: Lessons learned from a 15-year study, *Journal of Applied Ecology*, 57, 2316–2328,  
155 <https://doi.org/10.1111/1365-2664.13684>, 2020.

- Kikuchi, T., Seidel, D., Ehbrecht, M., Zemp, D. C., Brambach, F., Irawan, B., Sundawati, L., Hölscher, D., Kreft, H., and Paterno, G. B.: Combining planting trees and natural regeneration promotes long-term structural complexity in oil palm landscapes, *Forest Ecology and Management*, 569, 122182, <https://doi.org/10.1016/j.foreco.2024.122182>, 2024.
- Mapfumo, R. B., Murwira, A., Masocha, M., and Andriani, R.: The relationship between satellite-derived indices and species diversity across African savanna ecosystems, *International Journal of Applied Earth Observation and Geoinformation*, 52, 306–317, <https://doi.org/10.1016/j.jag.2016.06.025>, 2016.
- Marks, C. O., Muller-Landau, H. C., and Tilman, D.: Tree diversity, tree height and environmental harshness in eastern and western North America, *Ecology letters*, 19, 743–751, <https://doi.org/10.1111/ele.12608>, 2016.
- Paterno, G. B., Brambach, F., Guerrero-Ramírez, N., Zemp, D. C., Cantillo, A. F., Camarretta, N., Moura, C. C. M., Gailing, O., Ballauff, J., Polle, A., Schlund, M., Erasmi, S., Iddris, N. A., Khokthong, W., Sundawati, L., Irawan, B., Hölscher, D., and Kreft, H.: Diverse and larger tree islands promote native tree diversity in oil palm landscapes, *Science (New York, N.Y.)*, 386, 795–802, <https://doi.org/10.1126/science.ad01629>, 2024.
- Paterno, G. B., Siqueira Filho, J. A., and Ganade, G.: Species-specific facilitation, ontogenetic shifts and consequences for plant community succession, *J Vegetation Science*, 27, 606–615, <https://doi.org/10.1111/jvs.12382>, 2016.
- Pau, S., Gillespie, T. W., and Wolkovich, E. M.: Dissecting NDVI–species richness relationships in Hawaiian dry forests, *Journal of Biogeography*, 39, 1678–1686, <https://doi.org/10.1111/j.1365-2699.2012.02731.x>, 2012.
- Ren, Z., He, X., Pu, R., and Zheng, H.: The impact of urban forest structure and its spatial location on urban cool island intensity, *Urban Ecosyst*, 21, 863–874, <https://doi.org/10.1007/s11252-018-0776-4>, 2018.
- Tinya, F., Márialigeti, S., Bidló, A., and Ódor, P.: Environmental drivers of the forest regeneration in temperate mixed forests, *Forest Ecology and Management*, 433, 720–728, <https://doi.org/10.1016/j.foreco.2018.11.051>, 2019.
- Wang, X., Dallimer, M., Scott, C. E., Shi, W., and Gao, J.: Tree species richness and diversity predicts the magnitude of urban heat island mitigation effects of greenspaces, *The Science of the total environment*, 770, 145211, <https://doi.org/10.1016/j.scitotenv.2021.145211>, 2021.
- Yang, J. and Wang, Y.: Estimating evapotranspiration fraction by modeling two-dimensional space of NDVI/albedo and day–night land surface temperature difference: A comparative study, *Advances in Water Resources*, 34, 512–518, <https://doi.org/10.1016/j.advwatres.2011.01.006>, 2011.
- Zahawi, R. A. and Augspurger, C. K.: Tropical Forest Restoration: Tree Islands As Recruitment Foci In Degraded Lands Of Honduras, *Ecological applications a publication of the Ecological Society of America*, 16, 464–478, [https://doi.org/10.1890/1051-0761\(2006\)016\[0464:TFRTIA\]2.0.CO;2](https://doi.org/10.1890/1051-0761(2006)016[0464:TFRTIA]2.0.CO;2), 2006.
- Zemp, D. C., Guerrero-Ramírez, N., Brambach, F., Darras, K., Grass, I., Potapov, A., Röhl, A., Arimond, I., Ballauff, J., Behling, H., Berkelmann, D., Biagioni, S., Buchori, D., Craven, D., Daniel, R., Gailing, O., Ellsäßer, F., Fardiansah, R., Hennings, N., Irawan, B., Khokthong, W., Krashevskaya, V., Krause, A., Kückes, J., Li, K., Lorenz, H., Maraun, M., Merk, M. S., Moura, C. C. M., Mulyani, Y. A., Paterno, G. B., Pebrianti, H. D., Polle, A., Di Prameswari, A., Sachsenmaier, L., Scheu, S., Schneider, D., Setiajiati, F., Setyaningsih, C. A., Sundawati, L., Tschardtke, T., Wollni, M.,

- 190       Hölscher, D., and Kreft, H.: Tree islands enhance biodiversity and functioning in oil palm landscapes, *Nature*, 618, 316–321, <https://doi.org/10.1038/s41586-023-06086-5>, 2023.
- Zemp, D. C., Ehbrecht, M., Seidel, D., Ammer, C., Craven, D., Erkelenz, J., Irawan, B., Sundawati, L., Hölscher, D., and Kreft, H.: Mixed-species tree plantings enhance structural complexity in oil palm plantations, *Agriculture, Ecosystems & Environment*, 283, 106564, <https://doi.org/10.1016/j.agee.2019.06.003>, 2019.
- 195   Zhou, C. and Wang, K.: Biological and Environmental Controls on Evaporative Fractions at AmeriFlux Sites, *Journal of Applied Meteorology and Climatology*, 55, 145–161, <https://doi.org/10.1175/JAMC-D-15-0126.1>, 2016.
